# Supplementary material for: Mechanism of Ir(ppy)3 Guest Exciton Formation with the Exciplex-Forming TCTA:TPBI Cohost within a Phosphorescent Organic Light-Emitting Diode Environment
Source: MDPI journal article supplement (doi:10.3390/ijms23115940), 2022-05-25
Supplement: s1 [file s1]

Supporting Information for

**Mechanism of Ir(ppy)<sub>3</sub> Guest Exciton Formation with the Exciplex-  
Forming TCTA:TPBI Cohost within a Phosphorescent Organic  
Light Emitting Diode Environment**

Jae Whee Park, Kwang Hyun Cho, and Young Min Rhee\*

Department of Chemistry, Korea Advanced Institute of Science and Technology (KAIST), Daejeon  
34141, Korea

\* E-mail: ymrhee@kaist.ac.kr

**Table S1.** Singlet excited state energies obtained by TDA-TDDFT/CPCM and the  $\omega$ B97X-D3 functional with the optimized  $\alpha$ (CPCM) value.<sup>a</sup>

|                                                       |                               | $E$ (eV) |
|-------------------------------------------------------|-------------------------------|----------|
| $^1(\text{Ir}(\text{ppy})_3/\text{TCTA}/\text{TPBI})$ | $^1\text{G}^*_1$              | 2.9193   |
|                                                       | $^1\text{G}^*_2$              | 2.9785   |
|                                                       | $^1\text{G}^*_3$              | 2.9849   |
|                                                       | $^1(\text{D}^+/\text{A}^-)_1$ | 2.9858   |
|                                                       | $^1(\text{D}^+/\text{A}^-)_2$ | 2.9867   |
| $^1(\text{TCTA}/\text{TPBI}/\text{Ir}(\text{ppy})_3)$ | $^1(\text{G}^+/\text{A}^-)_1$ | 2.7348   |
|                                                       | $^1(\text{G}^+/\text{A}^-)_2$ | 2.7380   |
|                                                       | $^1(\text{G}^+/\text{A}^-)_3$ | 2.8710   |
|                                                       | $^1(\text{G}^+/\text{A}^-)_4$ | 2.8813   |
|                                                       | $^1(\text{G}^+/\text{A}^-)_5$ | 2.8819   |
|                                                       | $^1(\text{G}^+/\text{A}^-)_6$ | 2.8959   |
|                                                       | $^1\text{G}^*_1$              | 2.9111   |
|                                                       | $^1\text{G}^*_2$              | 2.9764   |
|                                                       | $^1\text{G}^*_3$              | 2.9800   |
|                                                       | $^1(\text{D}^+/\text{A}^-)_1$ | 3.0178   |
|                                                       | $^1(\text{D}^+/\text{A}^-)_2$ | 3.0205   |
| $^1(\text{TCTA}/\text{Ir}(\text{ppy})_3/\text{TPBI})$ | $^1(\text{D}^+/\text{A}^-)_1$ | 2.9082   |
|                                                       | $^1\text{G}^*_1$              | 2.9132   |
|                                                       | $^1(\text{D}^+/\text{A}^-)_2$ | 2.9190   |
|                                                       | $^1\text{G}^*_2$              | 2.9780   |
|                                                       | $^1\text{G}^*_3$              | 3.0049   |

<sup>a</sup> The optimized  $\alpha$ (CPCM) value in the presence of CPCM ( $\epsilon_r = 3.0$ ) is 0.023 bohr<sup>-1</sup>.

**Table S2.** Triplet excited state energies obtained by TDA-TDDFT/CPCM and the  $\omega$ B97X-D3 functional with the optimized  $\omega$ (CPCM) value.<sup>a</sup>

|                                                |                                                             | <i>E</i> (eV) |
|------------------------------------------------|-------------------------------------------------------------|---------------|
| <sup>3</sup> (Ir(ppy) <sub>3</sub> /TCTA/TPBI) | <sup>3</sup> G* <sub>1</sub>                                | 2.7294        |
|                                                | <sup>3</sup> G* <sub>2</sub>                                | 2.7478        |
|                                                | <sup>3</sup> G* <sub>3</sub>                                | 2.7494        |
|                                                | <sup>3</sup> A* <sub>1</sub>                                | 2.8864        |
|                                                | <sup>3</sup> G* <sub>4</sub>                                | 2.9445        |
|                                                | <sup>3</sup> G* <sub>5</sub>                                | 2.9651        |
|                                                | <sup>3</sup> G* <sub>6</sub>                                | 2.9754        |
|                                                | <sup>3</sup> (D <sup>+</sup> /A <sup>-</sup> ) <sub>1</sub> | 2.9857        |
|                                                | <sup>3</sup> (D <sup>+</sup> /A <sup>-</sup> ) <sub>2</sub> | 2.9866        |
| <sup>3</sup> (TCTA/TPBI/Ir(ppy) <sub>3</sub> ) | <sup>3</sup> (G <sup>+</sup> /A <sup>-</sup> ) <sub>1</sub> | 2.6960        |
|                                                | <sup>3</sup> (G <sup>+</sup> /A <sup>-</sup> ) <sub>2</sub> | 2.6996        |
|                                                | <sup>3</sup> G* <sub>1</sub>                                | 2.7171        |
|                                                | <sup>3</sup> G* <sub>2</sub>                                | 2.7733        |
|                                                | <sup>3</sup> G* <sub>3</sub>                                | 2.7796        |
|                                                | <sup>3</sup> (G <sup>+</sup> /A <sup>-</sup> ) <sub>3</sub> | 2.8622        |
|                                                | <sup>3</sup> (G <sup>+</sup> /A <sup>-</sup> ) <sub>4</sub> | 2.8654        |
|                                                | <sup>3</sup> (G <sup>+</sup> /A <sup>-</sup> ) <sub>5</sub> | 2.8739        |
|                                                | <sup>3</sup> (G <sup>+</sup> /A <sup>-</sup> ) <sub>6</sub> | 2.8754        |
|                                                | <sup>3</sup> A* <sub>1</sub>                                | 2.8997        |
|                                                | <sup>3</sup> G* <sub>4</sub>                                | 2.9556        |
|                                                | <sup>3</sup> G* <sub>5</sub>                                | 2.9705        |
|                                                | <sup>3</sup> G* <sub>6</sub>                                | 2.9731        |
|                                                | <sup>3</sup> (D <sup>+</sup> /A <sup>-</sup> ) <sub>1</sub> | 3.0178        |
|                                                | <sup>3</sup> (D <sup>+</sup> /A <sup>-</sup> ) <sub>2</sub> | 3.0204        |

|                                                |                                                             |        |
|------------------------------------------------|-------------------------------------------------------------|--------|
| <sup>3</sup> (TCTA/Ir(ppy) <sub>3</sub> /TPBI) | <sup>3</sup> G <sup>*</sup> <sub>1</sub>                    | 2.7157 |
|                                                | <sup>3</sup> G <sup>*</sup> <sub>2</sub>                    | 2.7544 |
|                                                | <sup>3</sup> G <sup>*</sup> <sub>3</sub>                    | 2.7667 |
|                                                | <sup>3</sup> A <sup>*</sup> <sub>1</sub>                    | 2.8855 |
|                                                | <sup>3</sup> (D <sup>+</sup> /A <sup>-</sup> ) <sub>1</sub> | 2.9082 |
|                                                | <sup>3</sup> (D <sup>+</sup> /A <sup>-</sup> ) <sub>2</sub> | 2.9189 |
|                                                | <sup>3</sup> G <sup>*</sup> <sub>4</sub>                    | 2.9276 |
|                                                | <sup>3</sup> G <sup>*</sup> <sub>5</sub>                    | 2.9797 |
|                                                | <sup>3</sup> G <sup>*</sup> <sub>6</sub>                    | 2.9912 |

<sup>a</sup> The optimized  $\omega$ (CPCM) value in the presence of CPCM ( $\epsilon_r = 3.0$ ) is 0.023 bohr<sup>-1</sup>.

**Table S3.** Partial charges<sup>a</sup> on Ir(ppy)<sub>3</sub>, TCTA, and TPBI (G, D, and A) for cohost CT states of three trimer model systems.

|                                                             | (Ir(ppy) <sub>3</sub> /TCTA/TPBI) |        |         | (TCTA/TPBI/Ir(ppy) <sub>3</sub> ) |        |         | (TCTA/Ir(ppy) <sub>3</sub> /TPBI) |        |         |
|-------------------------------------------------------------|-----------------------------------|--------|---------|-----------------------------------|--------|---------|-----------------------------------|--------|---------|
|                                                             | G                                 | D      | A       | G                                 | D      | A       | G                                 | D      | A       |
| <sup>1</sup> (D <sup>+</sup> /A <sup>-</sup> ) <sub>1</sub> | 0.0004                            | 0.9991 | -0.9995 | -0.0095                           | 0.9997 | -0.9902 | -0.0002                           | 0.9997 | -0.9995 |
| <sup>1</sup> (D <sup>+</sup> /A <sup>-</sup> ) <sub>2</sub> | 0.0004                            | 0.9992 | -0.9996 | -0.0102                           | 0.9995 | -0.9893 | 0.0                               | 0.9996 | -0.9996 |
| <sup>3</sup> (D <sup>+</sup> /A <sup>-</sup> ) <sub>1</sub> | 0.0004                            | 0.9989 | -0.9993 | -0.0095                           | 0.9992 | -0.9897 | -0.0002                           | 0.9992 | -0.9991 |
| <sup>3</sup> (D <sup>+</sup> /A <sup>-</sup> ) <sub>2</sub> | 0.0004                            | 0.9988 | -0.9991 | -0.0102                           | 0.9989 | -0.9887 | 0.0                               | 0.9994 | -0.9994 |

<sup>a</sup> In the unit of *e*.

**Table S4.** Electronic couplings<sup>a</sup> between singlet excited states for <sup>1</sup>(Ir(ppy)<sub>3</sub>/TCTA/TPBI).

|                                                             | <sup>1</sup> G <sub>1</sub> <sup>*</sup> | <sup>1</sup> G <sub>2</sub> <sup>*</sup> | <sup>1</sup> G <sub>3</sub> <sup>*</sup> | <sup>1</sup> (D <sup>+</sup> /A <sup>-</sup> ) <sub>1</sub> | <sup>1</sup> (D <sup>+</sup> /A <sup>-</sup> ) <sub>2</sub> |
|-------------------------------------------------------------|------------------------------------------|------------------------------------------|------------------------------------------|-------------------------------------------------------------|-------------------------------------------------------------|
| <sup>1</sup> G <sub>1</sub> <sup>*</sup>                    | -                                        | -148                                     | -152                                     | 12.4                                                        | 0.13                                                        |
| <sup>1</sup> G <sub>2</sub> <sup>*</sup>                    | -148                                     | -                                        | -133                                     | -7.54                                                       | 10.2                                                        |
| <sup>1</sup> G <sub>3</sub> <sup>*</sup>                    | -152                                     | -133                                     | -                                        | -3.96                                                       | -11.7                                                       |
| <sup>1</sup> (D <sup>+</sup> /A <sup>-</sup> ) <sub>1</sub> | 12.4                                     | -7.54                                    | -3.96                                    | -                                                           | 1.09                                                        |
| <sup>1</sup> (D <sup>+</sup> /A <sup>-</sup> ) <sub>2</sub> | 0.13                                     | 10.2                                     | -11.7                                    | 1.09                                                        | -                                                           |

<sup>a</sup> All electronic couplings are given in cm<sup>-1</sup>.

**Table S5.** Electronic couplings<sup>a</sup> between singlet excited states for <sup>1</sup>(TCTA/TPBI/Ir(ppy)<sub>3</sub>).

|                                                             | <sup>1</sup> (G <sup>+</sup> /A <sup>-</sup> ) <sub>1</sub> | <sup>1</sup> (G <sup>+</sup> /A <sup>-</sup> ) <sub>2</sub> | <sup>1</sup> (G <sup>+</sup> /A <sup>-</sup> ) <sub>3</sub> | <sup>1</sup> (G <sup>+</sup> /A <sup>-</sup> ) <sub>4</sub> | <sup>1</sup> (G <sup>+</sup> /A <sup>-</sup> ) <sub>5</sub> | <sup>1</sup> (G <sup>+</sup> /A <sup>-</sup> ) <sub>6</sub> | <sup>1</sup> G <sup>*</sup> <sub>1</sub> | <sup>1</sup> G <sup>*</sup> <sub>2</sub> | <sup>1</sup> G <sup>*</sup> <sub>3</sub> | <sup>1</sup> (D <sup>+</sup> /A <sup>-</sup> ) <sub>1</sub> | <sup>1</sup> (D <sup>+</sup> /A <sup>-</sup> ) <sub>2</sub> |
|-------------------------------------------------------------|-------------------------------------------------------------|-------------------------------------------------------------|-------------------------------------------------------------|-------------------------------------------------------------|-------------------------------------------------------------|-------------------------------------------------------------|------------------------------------------|------------------------------------------|------------------------------------------|-------------------------------------------------------------|-------------------------------------------------------------|
| <sup>1</sup> (G <sup>+</sup> /A <sup>-</sup> ) <sub>1</sub> | -                                                           | -269                                                        | 275                                                         | 37.4                                                        | 5.0                                                         | 54.6                                                        | -27.4                                    | 28.4                                     | 51.9                                     | -5.44                                                       | -1.02                                                       |
| <sup>1</sup> (G <sup>+</sup> /A <sup>-</sup> ) <sub>2</sub> | -269                                                        | -                                                           | 220                                                         | 293                                                         | -96.3                                                       | -206                                                        | -162                                     | 401                                      | -162                                     | 3.93                                                        | 0.14                                                        |
| <sup>1</sup> (G <sup>+</sup> /A <sup>-</sup> ) <sub>3</sub> | 275                                                         | 220                                                         | -                                                           | -126                                                        | -386                                                        | -183                                                        | 209                                      | 180                                      | 349                                      | -0.26                                                       | 1.47                                                        |
| <sup>1</sup> (G <sup>+</sup> /A <sup>-</sup> ) <sub>4</sub> | 37.4                                                        | 293                                                         | -126                                                        | -                                                           | 44.8                                                        | 341                                                         | -74.7                                    | -5.93                                    | 78.1                                     | 4.18                                                        | -0.91                                                       |
| <sup>1</sup> (G <sup>+</sup> /A <sup>-</sup> ) <sub>5</sub> | 5.0                                                         | -96.3                                                       | -386                                                        | 44.8                                                        | -                                                           | -282                                                        | -12.9                                    | 35.1                                     | 48.1                                     | 5.26                                                        | -2.02                                                       |
| <sup>1</sup> (G <sup>+</sup> /A <sup>-</sup> ) <sub>6</sub> | 54.6                                                        | -206                                                        | -183                                                        | 341                                                         | -282                                                        | -                                                           | 302                                      | 214                                      | -209                                     | 2.77                                                        | 0.99                                                        |
| <sup>1</sup> G <sup>*</sup> <sub>1</sub>                    | -27.4                                                       | -162                                                        | 209                                                         | -74.7                                                       | -12.9                                                       | 302                                                         | -                                        | 148                                      | 144                                      | -0.02                                                       | -0.46                                                       |
| <sup>1</sup> G <sup>*</sup> <sub>2</sub>                    | 28.4                                                        | 401                                                         | 180                                                         | -5.93                                                       | 35.1                                                        | 214                                                         | 148                                      | -                                        | -137                                     | -1.73                                                       | 0.55                                                        |
| <sup>1</sup> G <sup>*</sup> <sub>3</sub>                    | 51.9                                                        | -162                                                        | 349                                                         | 78.1                                                        | 48.1                                                        | -209                                                        | 144                                      | -137                                     | -                                        | -0.66                                                       | -0.76                                                       |
| <sup>1</sup> (D <sup>+</sup> /A <sup>-</sup> ) <sub>1</sub> | -5.44                                                       | 3.93                                                        | -0.26                                                       | 4.18                                                        | 5.26                                                        | 2.77                                                        | -0.02                                    | -1.73                                    | -0.66                                    | -                                                           | -0.85                                                       |
| <sup>1</sup> (D <sup>+</sup> /A <sup>-</sup> ) <sub>2</sub> | -1.02                                                       | 0.14                                                        | 1.47                                                        | -0.91                                                       | -2.02                                                       | 0.99                                                        | -0.46                                    | 0.55                                     | -0.76                                    | -0.85                                                       | -                                                           |

<sup>a</sup> All electronic couplings are given in cm<sup>-1</sup>.

**Table S6.** Electronic couplings<sup>a</sup> between singlet excited states for <sup>1</sup>(TCTA/Ir(ppy)<sub>3</sub>/TPBI).

|                                                             | <sup>1</sup> (D <sup>+</sup> /A <sup>-</sup> ) <sub>1</sub> | <sup>1</sup> G <sup>*</sup> <sub>1</sub> | <sup>1</sup> (D <sup>+</sup> /A <sup>-</sup> ) <sub>2</sub> | <sup>1</sup> G <sup>*</sup> <sub>2</sub> | <sup>1</sup> G <sup>*</sup> <sub>3</sub> |
|-------------------------------------------------------------|-------------------------------------------------------------|------------------------------------------|-------------------------------------------------------------|------------------------------------------|------------------------------------------|
| <sup>1</sup> (D <sup>+</sup> /A <sup>-</sup> ) <sub>1</sub> | -                                                           | -0.24                                    | 12                                                          | 0.042                                    | -0.061                                   |
| <sup>1</sup> G <sup>*</sup> <sub>1</sub>                    | -0.24                                                       | -                                        | 0.18                                                        | 135                                      | -144                                     |
| <sup>1</sup> (D <sup>+</sup> /A <sup>-</sup> ) <sub>2</sub> | 12                                                          | 0.18                                     | -                                                           | 0.18                                     | -0.2                                     |
| <sup>1</sup> G <sup>*</sup> <sub>2</sub>                    | 0.042                                                       | 135                                      | 0.18                                                        | -                                        | 147                                      |
| <sup>1</sup> G <sup>*</sup> <sub>3</sub>                    | -0.061                                                      | -144                                     | -0.2                                                        | 147                                      | -                                        |

<sup>a</sup> All electronic couplings are given in cm<sup>-1</sup>.



**Table S7.** Electronic couplings<sup>a</sup> between triplet excited states for <sup>3</sup>(Ir(ppy)<sub>3</sub>/TCTA/TPBI).

| (D, A)                                                      | <sup>3</sup> G <sub>1</sub> <sup>*</sup> | <sup>3</sup> G <sub>2</sub> <sup>*</sup> | <sup>3</sup> G <sub>3</sub> <sup>*</sup> | <sup>3</sup> A <sub>1</sub> <sup>*</sup> | <sup>3</sup> G <sub>4</sub> <sup>*</sup> | <sup>3</sup> G <sub>5</sub> <sup>*</sup> | <sup>3</sup> G <sub>6</sub> <sup>*</sup> | <sup>3</sup> (D <sup>+</sup> /A <sup>-</sup> ) <sub>1</sub> | <sup>3</sup> (D <sup>+</sup> /A <sup>-</sup> ) <sub>2</sub> |
|-------------------------------------------------------------|------------------------------------------|------------------------------------------|------------------------------------------|------------------------------------------|------------------------------------------|------------------------------------------|------------------------------------------|-------------------------------------------------------------|-------------------------------------------------------------|
| <sup>3</sup> G <sub>1</sub> <sup>*</sup>                    | -                                        | -29.2                                    | -27.6                                    | -0.0025                                  | -612                                     | -12.7                                    | 16.5                                     | -0.02                                                       | 0.065                                                       |
| <sup>3</sup> G <sub>2</sub> <sup>*</sup>                    | -29.2                                    | -                                        | -30.1                                    | -0.0011                                  | 11.3                                     | -611                                     | 3.84                                     | -0.015                                                      | 0.0052                                                      |
| <sup>3</sup> G <sub>3</sub> <sup>*</sup>                    | -27.6                                    | -30.1                                    | -                                        | -0.00081                                 | -17.8                                    | 19.9                                     | -628                                     | 0.035                                                       | -0.036                                                      |
| <sup>3</sup> A <sub>1</sub> <sup>*</sup>                    | -0.0025                                  | -0.0011                                  | -0.00081                                 | -                                        | -0.00075                                 | 0.0018                                   | -0.00057                                 | 7.22                                                        | 6.59                                                        |
| <sup>3</sup> G <sub>4</sub> <sup>*</sup>                    | -612                                     | 11.3                                     | -17.8                                    | -0.00075                                 | -                                        | -56.9                                    | -55.6                                    | -0.019                                                      | 0.052                                                       |
| <sup>3</sup> G <sub>5</sub> <sup>*</sup>                    | -12.7                                    | -611                                     | 19.9                                     | 0.0018                                   | -56.9                                    | -                                        | -52.7                                    | -0.0086                                                     | 0.012                                                       |
| <sup>3</sup> G <sub>6</sub> <sup>*</sup>                    | 16.5                                     | 3.84                                     | -628                                     | -0.00057                                 | -55.6                                    | -52.7                                    | -                                        | 0.0082                                                      | 0.026                                                       |
| <sup>3</sup> (D <sup>+</sup> /A <sup>-</sup> ) <sub>1</sub> | -0.02                                    | -0.015                                   | 0.035                                    | 7.22                                     | -0.019                                   | -0.0086                                  | 0.0082                                   | -                                                           | -0.069                                                      |
| <sup>3</sup> (D <sup>+</sup> /A <sup>-</sup> ) <sub>2</sub> | 0.065                                    | 0.0052                                   | -0.036                                   | 6.59                                     | 0.052                                    | 0.012                                    | 0.026                                    | -0.069                                                      | -                                                           |

<sup>a</sup> All electronic couplings are given in cm<sup>-1</sup>.

**Table S8.** Electronic couplings<sup>a</sup> between triplet excited states for <sup>3</sup>(TCTA/TPBI/Ir(ppy)<sub>3</sub>).

| (D, A)                                                      | <sup>3</sup> (G <sup>+</sup> /A <sup>-</sup> ) <sub>1</sub> | <sup>3</sup> (G <sup>+</sup> /A <sup>-</sup> ) <sub>2</sub> | <sup>3</sup> G <sup>*</sup> <sub>1</sub> | <sup>3</sup> G <sup>*</sup> <sub>2</sub> | <sup>3</sup> G <sup>*</sup> <sub>3</sub> | <sup>3</sup> (G <sup>+</sup> /A <sup>-</sup> ) <sub>3</sub> | <sup>3</sup> (G <sup>+</sup> /A <sup>-</sup> ) <sub>4</sub> | <sup>3</sup> (G <sup>+</sup> /A <sup>-</sup> ) <sub>5</sub> | <sup>3</sup> (G <sup>+</sup> /A <sup>-</sup> ) <sub>6</sub> | <sup>3</sup> A <sup>*</sup> <sub>1</sub> | <sup>3</sup> G <sup>*</sup> <sub>4</sub> | <sup>3</sup> G <sup>*</sup> <sub>5</sub> | <sup>3</sup> G <sup>*</sup> <sub>6</sub> | <sup>3</sup> (D <sup>+</sup> /A <sup>-</sup> ) <sub>1</sub> | <sup>3</sup> (D <sup>+</sup> /A <sup>-</sup> ) <sub>2</sub> |
|-------------------------------------------------------------|-------------------------------------------------------------|-------------------------------------------------------------|------------------------------------------|------------------------------------------|------------------------------------------|-------------------------------------------------------------|-------------------------------------------------------------|-------------------------------------------------------------|-------------------------------------------------------------|------------------------------------------|------------------------------------------|------------------------------------------|------------------------------------------|-------------------------------------------------------------|-------------------------------------------------------------|
| <sup>3</sup> (G <sup>+</sup> /A <sup>-</sup> ) <sub>1</sub> | -                                                           | -16                                                         | -177                                     | 7.8                                      | -311                                     | -15.4                                                       | 366                                                         | 158                                                         | 312                                                         | -4.21                                    | -24.2                                    | -47.4                                    | -52.7                                    | -0.98                                                       | 0.3                                                         |
| <sup>3</sup> (G <sup>+</sup> /A <sup>-</sup> ) <sub>2</sub> | -16                                                         | -                                                           | 129                                      | 300                                      | 8.28                                     | 130                                                         | -230                                                        | 395                                                         | 131                                                         | 23.4                                     | -9.5                                     | 51.8                                     | -97.3                                    | 1.94                                                        | 1.12                                                        |
| <sup>3</sup> G <sup>*</sup> <sub>1</sub>                    | -177                                                        | 129                                                         | -                                        | 65.9                                     | 75.6                                     | -424                                                        | -183                                                        | -84.6                                                       | 155                                                         | -2.02                                    | -46                                      | 86.3                                     | 99.1                                     | -0.81                                                       | 0.14                                                        |
| <sup>3</sup> G <sup>*</sup> <sub>2</sub>                    | 7.8                                                         | 300                                                         | 65.9                                     | -                                        | 32.8                                     | 16.2                                                        | 66                                                          | 28.2                                                        | 103                                                         | 0.17                                     | 298                                      | 24.7                                     | 33.4                                     | -0.26                                                       | 0.24                                                        |
| <sup>3</sup> G <sup>*</sup> <sub>3</sub>                    | -311                                                        | 8.28                                                        | 75.6                                     | 32.8                                     | -                                        | 159                                                         | -54.4                                                       | 131                                                         | 17.3                                                        | -11.1                                    | 7.92                                     | -246                                     | 42.7                                     | -0.075                                                      | -0.11                                                       |
| <sup>3</sup> (G <sup>+</sup> /A <sup>-</sup> ) <sub>3</sub> | -15.4                                                       | 130                                                         | -424                                     | 16.2                                     | 159                                      | -                                                           | 5.94                                                        | 79.7                                                        | -76.2                                                       | -74.3                                    | 186                                      | -248                                     | -43.1                                    | 2.04                                                        | -0.9                                                        |
| <sup>3</sup> (G <sup>+</sup> /A <sup>-</sup> ) <sub>4</sub> | 366                                                         | -230                                                        | -183                                     | 66                                       | -54.4                                    | 5.94                                                        | -                                                           | 102                                                         | -196                                                        | -58                                      | 66                                       | -84.8                                    | -315                                     | 2.57                                                        | -1.35                                                       |
| <sup>3</sup> (G <sup>+</sup> /A <sup>-</sup> ) <sub>5</sub> | 158                                                         | 395                                                         | -84.6                                    | 28.2                                     | 131                                      | 79.7                                                        | 102                                                         | -                                                           | -72.4                                                       | 2.71                                     | 248                                      | 20.9                                     | -36.5                                    | -0.25                                                       | -0.42                                                       |
| <sup>3</sup> (G <sup>+</sup> /A <sup>-</sup> ) <sub>6</sub> | 312                                                         | 131                                                         | 155                                      | 103                                      | 17.3                                     | -76.2                                                       | -196                                                        | -72.4                                                       | -                                                           | 43.2                                     | -69.6                                    | 314                                      | 2.09                                     | -0.016                                                      | -2.64                                                       |
| <sup>3</sup> A <sup>*</sup> <sub>1</sub>                    | -4.21                                                       | 23.4                                                        | -2.02                                    | 0.17                                     | -11.1                                    | -74.3                                                       | -58                                                         | 2.71                                                        | 43.2                                                        | -                                        | 5.04                                     | -0.38                                    | -6.77                                    | -3.13                                                       | -5.14                                                       |
| <sup>3</sup> G <sup>*</sup> <sub>4</sub>                    | -24.2                                                       | -9.5                                                        | -46                                      | 298                                      | 7.92                                     | 186                                                         | 66                                                          | 248                                                         | -69.6                                                       | 5.04                                     | -                                        | 47.3                                     | 60.5                                     | -0.092                                                      | 0.14                                                        |
| <sup>3</sup> G <sup>*</sup> <sub>5</sub>                    | -47.4                                                       | 51.8                                                        | 86.3                                     | 24.7                                     | -246                                     | -248                                                        | -84.8                                                       | 20.9                                                        | 314                                                         | -0.38                                    | 47.3                                     | -                                        | -59.4                                    | -0.12                                                       | 0.049                                                       |
| <sup>3</sup> G <sup>*</sup> <sub>6</sub>                    | -52.7                                                       | -97.3                                                       | 99.1                                     | 33.4                                     | 42.7                                     | -43.1                                                       | -315                                                        | -36.5                                                       | 2.09                                                        | -6.77                                    | 60.5                                     | -59.4                                    | -                                        | 0.21                                                        | -0.046                                                      |
| <sup>3</sup> (D <sup>+</sup> /A <sup>-</sup> ) <sub>1</sub> | -0.98                                                       | 1.94                                                        | -0.81                                    | -0.26                                    | -0.075                                   | 2.04                                                        | 2.57                                                        | -0.25                                                       | -0.016                                                      | -3.13                                    | -0.092                                   | -0.12                                    | 0.21                                     | -                                                           | -5.11                                                       |
| <sup>3</sup> (D <sup>+</sup> /A <sup>-</sup> ) <sub>2</sub> | 0.3                                                         | 1.12                                                        | 0.14                                     | 0.24                                     | -0.11                                    | -0.9                                                        | -1.35                                                       | -0.42                                                       | -2.64                                                       | -5.14                                    | 0.14                                     | 0.049                                    | -0.046                                   | -5.11                                                       | -                                                           |

<sup>a</sup> All electronic couplings are given in cm<sup>-1</sup>.

**Table S9.** Electronic couplings<sup>a</sup> between triplet excited states for <sup>3</sup>(TCTA/Ir(ppy)<sub>3</sub>/TPBI).

| (D, A)                                                      | <sup>3</sup> G <sup>*</sup> <sub>1</sub> | <sup>3</sup> G <sup>*</sup> <sub>2</sub> | <sup>3</sup> G <sup>*</sup> <sub>3</sub> | <sup>3</sup> A <sup>*</sup> <sub>1</sub> | <sup>3</sup> (D <sup>+</sup> /A <sup>-</sup> ) <sub>1</sub> | <sup>3</sup> (D <sup>+</sup> /A <sup>-</sup> ) <sub>2</sub> | <sup>3</sup> G <sup>*</sup> <sub>4</sub> | <sup>3</sup> G <sup>*</sup> <sub>5</sub> | <sup>3</sup> G <sup>*</sup> <sub>6</sub> |
|-------------------------------------------------------------|------------------------------------------|------------------------------------------|------------------------------------------|------------------------------------------|-------------------------------------------------------------|-------------------------------------------------------------|------------------------------------------|------------------------------------------|------------------------------------------|
| <sup>3</sup> G <sup>*</sup> <sub>1</sub>                    | -                                        | 30.4                                     | -27.8                                    | 0.063                                    | -0.013                                                      | 0.002                                                       | -594                                     | 19.2                                     | -9.82                                    |
| <sup>3</sup> G <sup>*</sup> <sub>2</sub>                    | 30.4                                     | -                                        | 28.1                                     | 0.0025                                   | -0.0033                                                     | -0.0028                                                     | -20                                      | 7.88                                     | -630                                     |
| <sup>3</sup> G <sup>*</sup> <sub>3</sub>                    | -27.8                                    | 28.1                                     | -                                        | 0.0037                                   | -0.0014                                                     | 0.00022                                                     | -8.05                                    | -621                                     | -15.9                                    |
| <sup>3</sup> A <sup>*</sup> <sub>1</sub>                    | 0.063                                    | 0.0025                                   | 0.0037                                   | -                                        | -1.98                                                       | -0.3                                                        | -0.15                                    | -0.00026                                 | 0.0031                                   |
| <sup>3</sup> (D <sup>+</sup> /A <sup>-</sup> ) <sub>1</sub> | -0.013                                   | -0.0033                                  | -0.0014                                  | -1.98                                    | -                                                           | 11.6                                                        | 0.0033                                   | -0.0021                                  | 0.0022                                   |
| <sup>3</sup> (D <sup>+</sup> /A <sup>-</sup> ) <sub>2</sub> | 0.002                                    | -0.0028                                  | 0.00022                                  | -0.3                                     | 11.6                                                        | -                                                           | 0.0014                                   | -0.00099                                 | -0.00046                                 |
| <sup>3</sup> G <sup>*</sup> <sub>4</sub>                    | -594                                     | -20                                      | -8.05                                    | -0.15                                    | 0.0033                                                      | 0.0014                                                      | -                                        | -58.8                                    | 54.1                                     |
| <sup>3</sup> G <sup>*</sup> <sub>5</sub>                    | 19.2                                     | 7.88                                     | -621                                     | -0.00026                                 | -0.0021                                                     | -0.00099                                                    | -58.8                                    | -                                        | 55.4                                     |
| <sup>3</sup> G <sup>*</sup> <sub>6</sub>                    | -9.82                                    | -630                                     | -15.9                                    | 0.0031                                   | 0.0022                                                      | -0.00046                                                    | 54.1                                     | 55.4                                     | -                                        |

<sup>a</sup> All electronic couplings are given in cm<sup>-1</sup>.

**Table S10.** Rate constants<sup>a</sup> for electronic transitions  $i \rightarrow j$  by the Förster theory for  $^1(\text{Ir}(\text{ppy})_3/\text{TCTA}/\text{TPBI})$ .

| $(i, j)^b$                    | $^1\text{G}_1^*$      | $^1\text{G}_2^*$      | $^1\text{G}_3^*$      | $^1(\text{D}^+/\text{A}^-)_1$ | $^1(\text{D}^+/\text{A}^-)_2$ |
|-------------------------------|-----------------------|-----------------------|-----------------------|-------------------------------|-------------------------------|
| $^1\text{G}_1^*$              | -                     | $1.96 \times 10^{10}$ | $1.80 \times 10^{10}$ | $1.18 \times 10^8$            | $1.28 \times 10^4$            |
| $^1\text{G}_2^*$              | $1.94 \times 10^{11}$ | -                     | $4.74 \times 10^{10}$ | $1.49 \times 10^8$            | $2.70 \times 10^8$            |
| $^1\text{G}_3^*$              | $2.28 \times 10^{11}$ | $6.07 \times 10^{10}$ | -                     | $4.65 \times 10^7$            | $3.97 \times 10^8$            |
| $^1(\text{D}^+/\text{A}^-)_1$ | $1.55 \times 10^9$    | $1.98 \times 10^8$    | $4.82 \times 10^7$    | -                             | $3.52 \times 10^6$            |
| $^1(\text{D}^+/\text{A}^-)_2$ | $1.74 \times 10^5$    | $3.71 \times 10^8$    | $4.25 \times 10^8$    | $3.64 \times 10^6$            | -                             |

<sup>a</sup> In  $\text{s}^{-1}$  units.

<sup>b</sup>  $i$  and  $j$  denote the donor (column) and acceptor (row) states for electronic transitions, respectively.

**Table S11.** Rate constants<sup>a</sup> for electronic transitions  $i \rightarrow j$  by the Förster theory for <sup>1</sup>(TCTA/TPBI/Ir(ppy)<sub>3</sub>).

| $(i, j)^b$                                                  | <sup>1</sup> (G <sup>+</sup> /A <sup>-</sup> ) <sub>1</sub> | <sup>1</sup> (G <sup>+</sup> /A <sup>-</sup> ) <sub>2</sub> | <sup>1</sup> (G <sup>+</sup> /A <sup>-</sup> ) <sub>3</sub> | <sup>1</sup> (G <sup>+</sup> /A <sup>-</sup> ) <sub>4</sub> | <sup>1</sup> (G <sup>+</sup> /A <sup>-</sup> ) <sub>5</sub> | <sup>1</sup> (G <sup>+</sup> /A <sup>-</sup> ) <sub>6</sub> | <sup>1</sup> G <sup>*</sup> <sub>1</sub> | <sup>1</sup> G <sup>*</sup> <sub>2</sub> | <sup>1</sup> G <sup>*</sup> <sub>3</sub> | <sup>1</sup> (D <sup>+</sup> /A <sup>-</sup> ) <sub>1</sub> | <sup>1</sup> (D <sup>+</sup> /A <sup>-</sup> ) <sub>2</sub> |
|-------------------------------------------------------------|-------------------------------------------------------------|-------------------------------------------------------------|-------------------------------------------------------------|-------------------------------------------------------------|-------------------------------------------------------------|-------------------------------------------------------------|------------------------------------------|------------------------------------------|------------------------------------------|-------------------------------------------------------------|-------------------------------------------------------------|
| <sup>1</sup> (G <sup>+</sup> /A <sup>-</sup> ) <sub>1</sub> | -                                                           | $2.05 \times 10^{11}$                                       | $1.14 \times 10^{10}$                                       | $1.63 \times 10^8$                                          | $2.88 \times 10^6$                                          | $3.10 \times 10^8$                                          | $4.08 \times 10^7$                       | $7.28 \times 10^6$                       | $2.20 \times 10^7$                       | $7.88 \times 10^4$                                          | $2.54 \times 10^3$                                          |
| <sup>1</sup> (G <sup>+</sup> /A <sup>-</sup> ) <sub>2</sub> | $2.32 \times 10^{11}$                                       | -                                                           | $7.92 \times 10^9$                                          | $1.09 \times 10^{10}$                                       | $1.16 \times 10^9$                                          | $4.79 \times 10^9$                                          | $1.55 \times 10^9$                       | $1.60 \times 10^9$                       | $2.34 \times 10^8$                       | $4.52 \times 10^4$                                          | $5.37 \times 10^1$                                          |
| <sup>1</sup> (G <sup>+</sup> /A <sup>-</sup> ) <sub>3</sub> | $2.21 \times 10^{12}$                                       | $1.36 \times 10^{12}$                                       | -                                                           | $3.92 \times 10^{10}$                                       | $3.93 \times 10^{11}$                                       | $7.59 \times 10^{10}$                                       | $5.91 \times 10^{10}$                    | $1.03 \times 10^{10}$                    | $3.55 \times 10^{10}$                    | $7.75 \times 10^3$                                          | $2.35 \times 10^5$                                          |
| <sup>1</sup> (G <sup>+</sup> /A <sup>-</sup> ) <sub>4</sub> | $4.72 \times 10^{10}$                                       | $2.78 \times 10^{12}$                                       | $5.84 \times 10^{10}$                                       | -                                                           | $5.99 \times 10^9$                                          | $3.22 \times 10^{11}$                                       | $9.32 \times 10^9$                       | $1.41 \times 10^7$                       | $2.26 \times 10^9$                       | $2.61 \times 10^6$                                          | $1.16 \times 10^5$                                          |
| <sup>1</sup> (G <sup>+</sup> /A <sup>-</sup> ) <sub>5</sub> | $8.52 \times 10^8$                                          | $3.02 \times 10^{11}$                                       | $5.54 \times 10^{11}$                                       | $6.14 \times 10^9$                                          | -                                                           | $2.22 \times 10^{11}$                                       | $2.83 \times 10^8$                       | $5.03 \times 10^8$                       | $8.69 \times 10^8$                       | $4.21 \times 10^6$                                          | $5.81 \times 10^5$                                          |
| <sup>1</sup> (G <sup>+</sup> /A <sup>-</sup> ) <sub>6</sub> | $1.07 \times 10^{11}$                                       | $1.46 \times 10^{12}$                                       | $1.35 \times 10^{11}$                                       | $3.85 \times 10^{11}$                                       | $2.60 \times 10^{11}$                                       | -                                                           | $1.67 \times 10^{11}$                    | $2.05 \times 10^{10}$                    | $1.80 \times 10^{10}$                    | $1.28 \times 10^6$                                          | $1.53 \times 10^5$                                          |
| <sup>1</sup> G <sup>*</sup> <sub>1</sub>                    | $3.73 \times 10^{10}$                                       | $1.26 \times 10^{12}$                                       | $2.79 \times 10^{11}$                                       | $2.95 \times 10^{10}$                                       | $8.76 \times 10^8$                                          | $4.43 \times 10^{11}$                                       | -                                        | $1.73 \times 10^{10}$                    | $1.51 \times 10^{10}$                    | $1.21 \times 10^2$                                          | $6.09 \times 10^4$                                          |
| <sup>1</sup> G <sup>*</sup> <sub>2</sub>                    | $8.33 \times 10^{10}$                                       | $1.61 \times 10^{13}$                                       | $6.07 \times 10^{11}$                                       | $5.60 \times 10^8$                                          | $1.95 \times 10^{10}$                                       | $6.79 \times 10^{11}$                                       | $2.16 \times 10^{11}$                    | -                                        | $5.27 \times 10^{10}$                    | $3.91 \times 10^6$                                          | $3.79 \times 10^5$                                          |
| <sup>1</sup> G <sup>*</sup> <sub>3</sub>                    | $2.89 \times 10^{11}$                                       | $2.73 \times 10^{12}$                                       | $2.41 \times 10^{12}$                                       | $1.03 \times 10^{11}$                                       | $3.86 \times 10^{10}$                                       | $6.87 \times 10^{11}$                                       | $2.17 \times 10^{11}$                    | $6.05 \times 10^{10}$                    | -                                        | $6.17 \times 10^5$                                          | $7.71 \times 10^5$                                          |
| <sup>1</sup> (D <sup>+</sup> /A <sup>-</sup> ) <sub>1</sub> | $4.48 \times 10^9$                                          | $2.27 \times 10^9$                                          | $2.27 \times 10^6$                                          | $5.13 \times 10^8$                                          | $8.08 \times 10^8$                                          | $2.11 \times 10^8$                                          | $7.52 \times 10^3$                       | $1.94 \times 10^7$                       | $2.66 \times 10^6$                       | -                                                           | $2.07 \times 10^6$                                          |
| <sup>1</sup> (D <sup>+</sup> /A <sup>-</sup> ) <sub>2</sub> | $1.60 \times 10^8$                                          | $2.99 \times 10^6$                                          | $7.62 \times 10^7$                                          | $2.54 \times 10^7$                                          | $1.24 \times 10^8$                                          | $2.80 \times 10^7$                                          | $4.19 \times 10^6$                       | $2.09 \times 10^6$                       | $3.70 \times 10^6$                       | $2.30 \times 10^6$                                          | -                                                           |

<sup>a</sup> In s<sup>-1</sup> units.

<sup>b</sup>  $i$  and  $j$  denote the donor (column) and acceptor (row) states for electronic transitions, respectively.

**Table S12.** Rate constants<sup>a</sup> for electronic transitions  $i \rightarrow j$  by the Förster theory for <sup>1</sup>(TCTA/Ir(ppy)<sub>3</sub>/TPBI).

| $(i, j)^b$                                                  | <sup>1</sup> (D <sup>+</sup> /A <sup>-</sup> ) <sub>1</sub> | <sup>1</sup> G* <sub>1</sub> | <sup>1</sup> (D <sup>+</sup> /A <sup>-</sup> ) <sub>2</sub> | <sup>1</sup> G* <sub>2</sub> | <sup>1</sup> G* <sub>3</sub> |
|-------------------------------------------------------------|-------------------------------------------------------------|------------------------------|-------------------------------------------------------------|------------------------------|------------------------------|
| <sup>1</sup> (D <sup>+</sup> /A <sup>-</sup> ) <sub>1</sub> | -                                                           | $1.56 \times 10^5$           | $3.50 \times 10^8$                                          | $1.24 \times 10^3$           | $1.45 \times 10^3$           |
| <sup>1</sup> G* <sub>1</sub>                                | $1.89 \times 10^5$                                          | -                            | $8.59 \times 10^4$                                          | $1.44 \times 10^{10}$        | $8.97 \times 10^9$           |
| <sup>1</sup> (D <sup>+</sup> /A <sup>-</sup> ) <sub>2</sub> | $5.31 \times 10^8$                                          | $1.07 \times 10^5$           | -                                                           | $2.78 \times 10^4$           | $1.99 \times 10^4$           |
| <sup>1</sup> G* <sub>2</sub>                                | $1.85 \times 10^4$                                          | $1.76 \times 10^{11}$        | $2.73 \times 10^5$                                          | -                            | $3.83 \times 10^{10}$        |
| <sup>1</sup> G* <sub>3</sub>                                | $6.13 \times 10^4$                                          | $3.11 \times 10^{11}$        | $5.52 \times 10^5$                                          | $1.08 \times 10^{11}$        | -                            |

<sup>a</sup> In s<sup>-1</sup> units.

<sup>b</sup>  $i$  and  $j$  denote the donor (column) and acceptor (row) states for electronic transitions, respectively.

**Table S13.** Rate constants<sup>a</sup> for electronic transitions  $i \rightarrow j$  by the Förster theory for  $^3(\text{Ir}(\text{ppy})_3/\text{TCTA}/\text{TPBI})$ .

| $(i, j)^b$                    | $^3\text{G}_1^*$      | $^3\text{G}_2^*$      | $^3\text{G}_3^*$      | $^3\text{A}_1^*$      | $^3\text{G}_4^*$      | $^3\text{G}_5^*$      | $^3\text{G}_6^*$      | $^3(\text{D}^+/\text{A}^-)_1$ | $^3(\text{D}^+/\text{A}^-)_2$ |
|-------------------------------|-----------------------|-----------------------|-----------------------|-----------------------|-----------------------|-----------------------|-----------------------|-------------------------------|-------------------------------|
| $^3\text{G}_1^*$              | -                     | $1.80 \times 10^9$    | $1.56 \times 10^9$    | $5.61 \times 10^{-1}$ | $7.16 \times 10^9$    | $1.72 \times 10^6$    | $2.18 \times 10^6$    | $2.46 \times 10^0$            | $2.42 \times 10^1$            |
| $^3\text{G}_2^*$              | $3.66 \times 10^9$    | -                     | $2.65 \times 10^9$    | $1.58 \times 10^{-1}$ | $4.05 \times 10^6$    | $6.71 \times 10^9$    | $1.99 \times 10^5$    | $2.39 \times 10^0$            | $2.63 \times 10^{-1}$         |
| $^3\text{G}_3^*$              | $3.37 \times 10^9$    | $2.82 \times 10^9$    | -                     | $9.76 \times 10^{-2}$ | $1.04 \times 10^7$    | $7.46 \times 10^6$    | $5.56 \times 10^9$    | $1.28 \times 10^1$            | $1.31 \times 10^1$            |
| $^3\text{A}_1^*$              | $2.44 \times 10^2$    | $3.36 \times 10^1$    | $1.95 \times 10^1$    | -                     | $5.12 \times 10^{-1}$ | $1.85 \times 10^0$    | $1.51 \times 10^{-1}$ | $1.90 \times 10^7$            | $1.55 \times 10^7$            |
| $^3\text{G}_4^*$              | $2.94 \times 10^{13}$ | $8.16 \times 10^9$    | $1.98 \times 10^{10}$ | $4.84 \times 10^0$    | -                     | $6.51 \times 10^9$    | $5.04 \times 10^9$    | $4.91 \times 10^2$            | $3.50 \times 10^3$            |
| $^3\text{G}_5^*$              | $1.57 \times 10^{10}$ | $3.00 \times 10^{13}$ | $3.14 \times 10^{10}$ | $3.88 \times 10^1$    | $1.44 \times 10^{10}$ | -                     | $6.85 \times 10^9$    | $1.49 \times 10^2$            | $3.02 \times 10^2$            |
| $^3\text{G}_6^*$              | $2.95 \times 10^{10}$ | $1.32 \times 10^9$    | $3.48 \times 10^{13}$ | $4.71 \times 10^0$    | $1.66 \times 10^{10}$ | $1.02 \times 10^{10}$ | -                     | $1.65 \times 10^2$            | $1.67 \times 10^3$            |
| $^3(\text{D}^+/\text{A}^-)_1$ | $4.97 \times 10^4$    | $2.38 \times 10^4$    | $1.19 \times 10^5$    | $8.86 \times 10^8$    | $2.42 \times 10^3$    | $3.30 \times 10^2$    | $2.45 \times 10^2$    | -                             | $1.41 \times 10^4$            |
| $^3(\text{D}^+/\text{A}^-)_2$ | $5.07 \times 10^5$    | $2.70 \times 10^3$    | $1.26 \times 10^5$    | $7.49 \times 10^8$    | $1.79 \times 10^4$    | $6.93 \times 10^2$    | $2.58 \times 10^3$    | $1.46 \times 10^4$            | -                             |

<sup>a</sup> In  $\text{s}^{-1}$  units.

<sup>b</sup>  $i$  and  $j$  denote the donor (column) and acceptor (row) states for electronic transitions, respectively.

**Table S14.** Rate constants<sup>a</sup> for electronic transitions  $i \rightarrow j$  by the Förster theory for <sup>3</sup>(TCTA/TPBI/Ir(ppy))<sub>3</sub>.

| $(i, j)^b$        | ${}^3(G^+/A^-)_1$     | ${}^3G^*_1$           | ${}^3G^*_2$           | ${}^3G^*_3$           | ${}^3(G^+/A^-)_3$     | ${}^3(G^+/A^-)_4$     | ${}^3(G^+/A^-)_5$     | ${}^3(G^+/A^-)_6$     | ${}^3A_1$             | ${}^3G^*_4$           | ${}^3G^*_5$           | ${}^3G^*_6$           | ${}^3(D^+/A^-)_1$  | ${}^3(D^+/A^-)_2$  |
|-------------------|-----------------------|-----------------------|-----------------------|-----------------------|-----------------------|-----------------------|-----------------------|-----------------------|-----------------------|-----------------------|-----------------------|-----------------------|--------------------|--------------------|
| ${}^3(G^+/A^-)_1$ | -                     | $7.18 \times 10^8$    | $6.25 \times 10^{10}$ | $3.67 \times 10^7$    | $5.08 \times 10^{10}$ | $1.67 \times 10^7$    | $8.75 \times 10^9$    | $1.30 \times 10^9$    | $4.64 \times 10^5$    | $3.12 \times 10^6$    | $7.71 \times 10^6$    | $8.82 \times 10^6$    | $7.57 \times 10^2$ | $6.57 \times 10^1$ |
| ${}^3(G^+/A^-)_2$ | $8.25 \times 10^8$    | -                     | $3.54 \times 10^{10}$ | $5.89 \times 10^{10}$ | $3.89 \times 10^7$    | $1.31 \times 10^9$    | $3.77 \times 10^9$    | $8.95 \times 10^9$    | $1.59 \times 10^7$    | $5.38 \times 10^5$    | $1.03 \times 10^7$    | $3.36 \times 10^7$    | $3.35 \times 10^3$ | $1.03 \times 10^3$ |
| ${}^3G^*_1$       | $1.41 \times 10^{11}$ | $6.96 \times 10^{10}$ | -                     | $4.16 \times 10^9$    | $4.78 \times 10^9$    | $2.17 \times 10^{10}$ | $3.73 \times 10^9$    | $6.46 \times 10^8$    | $1.88 \times 10^5$    | $2.09 \times 10^7$    | $4.79 \times 10^7$    | $5.85 \times 10^7$    | $1.01 \times 10^3$ | $2.69 \times 10^1$ |
| ${}^3G^*_2$       | $7.30 \times 10^8$    | $1.02 \times 10^{12}$ | $3.66 \times 10^{10}$ | -                     | $2.87 \times 10^9$    | $1.22 \times 10^8$    | $1.88 \times 10^9$    | $2.81 \times 10^8$    | $5.72 \times 10^3$    | $4.14 \times 10^9$    | $1.90 \times 10^7$    | $3.24 \times 10^7$    | $5.70 \times 10^2$ | $4.55 \times 10^2$ |
| ${}^3G^*_3$       | $1.29 \times 10^{12}$ | $8.58 \times 10^8$    | $5.36 \times 10^{10}$ | $3.66 \times 10^9$    | -                     | $1.35 \times 10^{10}$ | $1.47 \times 10^9$    | $7.06 \times 10^9$    | $2.74 \times 10^7$    | $3.44 \times 10^6$    | $2.24 \times 10^9$    | $6.29 \times 10^7$    | $5.59 \times 10^1$ | $1.08 \times 10^2$ |
| ${}^3(G^+/A^-)_3$ | $1.04 \times 10^{10}$ | $7.05 \times 10^{11}$ | $5.95 \times 10^{12}$ | $3.80 \times 10^9$    | $3.29 \times 10^{11}$ | -                     | $1.00 \times 10^8$    | $1.53 \times 10^{10}$ | $7.86 \times 10^9$    | $1.45 \times 10^{10}$ | $1.82 \times 10^{10}$ | $5.18 \times 10^8$    | $3.88 \times 10^5$ | $7.10 \times 10^4$ |
| ${}^3(G^+/A^-)_4$ | $6.13 \times 10^{12}$ | $2.30 \times 10^{12}$ | $1.15 \times 10^{12}$ | $6.63 \times 10^{10}$ | $4.07 \times 10^{10}$ | $1.13 \times 10^8$    | -                     | $2.66 \times 10^{10}$ | $5.11 \times 10^9$    | $1.96 \times 10^9$    | $2.29 \times 10^9$    | $2.98 \times 10^{10}$ | $6.64 \times 10^5$ | $1.72 \times 10^5$ |
| ${}^3(G^+/A^-)_5$ | $1.27 \times 10^{12}$ | $7.59 \times 10^{12}$ | $2.78 \times 10^{11}$ | $1.38 \times 10^{10}$ | $2.71 \times 10^{11}$ | $2.40 \times 10^{10}$ | $3.70 \times 10^{10}$ | -                     | $1.54 \times 10^{10}$ | $3.35 \times 10^{10}$ | $1.71 \times 10^8$    | $4.88 \times 10^8$    | $8.00 \times 10^3$ | $2.07 \times 10^4$ |
| ${}^3(G^+/A^-)_6$ | $5.06 \times 10^{12}$ | $8.49 \times 10^{11}$ | $9.50 \times 10^{11}$ | $1.90 \times 10^{11}$ | $4.82 \times 10^9$    | $2.26 \times 10^{10}$ | $1.41 \times 10^{11}$ | $1.63 \times 10^{10}$ | $3.49 \times 10^9$    | $2.73 \times 10^9$    | $3.97 \times 10^{10}$ | $1.66 \times 10^6$    | $3.28 \times 10^1$ | $8.45 \times 10^5$ |
| ${}^3A_1$         | $1.23 \times 10^9$    | $3.65 \times 10^{10}$ | $2.19 \times 10^8$    | $7.60 \times 10^5$    | $2.85 \times 10^9$    | $3.35 \times 10^{10}$ | $1.93 \times 10^{10}$ | $3.60 \times 10^7$    | -                     | $2.45 \times 10^7$    | $1.01 \times 10^5$    | $3.02 \times 10^7$    | $2.30 \times 10^6$ | $5.83 \times 10^6$ |
| ${}^3G^*_4$       | $7.18 \times 10^{10}$ | $1.07 \times 10^{10}$ | $2.12 \times 10^{11}$ | $4.78 \times 10^{12}$ | $3.12 \times 10^9$    | $5.37 \times 10^{11}$ | $6.42 \times 10^{10}$ | $7.90 \times 10^{11}$ | $2.13 \times 10^8$    | -                     | $5.04 \times 10^9$    | $7.84 \times 10^9$    | $7.17 \times 10^3$ | $1.53 \times 10^4$ |
| ${}^3G^*_5$       | $3.15 \times 10^{11}$ | $3.66 \times 10^{11}$ | $8.65 \times 10^{11}$ | $3.91 \times 10^{10}$ | $3.60 \times 10^{12}$ | $1.20 \times 10^{12}$ | $1.34 \times 10^{11}$ | $7.16 \times 10^9$    | $1.57 \times 10^6$    | $8.96 \times 10^9$    | -                     | $1.01 \times 10^{10}$ | $1.78 \times 10^4$ | $2.62 \times 10^3$ |
| ${}^3G^*_6$       | $3.99 \times 10^{11}$ | $1.32 \times 10^{12}$ | $1.17 \times 10^{12}$ | $7.36 \times 10^{10}$ | $1.12 \times 10^{11}$ | $3.78 \times 10^{10}$ | $1.92 \times 10^{12}$ | $2.26 \times 10^{10}$ | $5.16 \times 10^8$    | $1.54 \times 10^{10}$ | $1.12 \times 10^{10}$ | -                     | $5.35 \times 10^4$ | $2.48 \times 10^3$ |
| ${}^3(D^+/A^-)_1$ | $1.93 \times 10^8$    | $7.43 \times 10^8$    | $1.14 \times 10^8$    | $7.30 \times 10^6$    | $5.61 \times 10^5$    | $1.59 \times 10^8$    | $2.41 \times 10^8$    | $2.09 \times 10^6$    | $2.22 \times 10^8$    | $7.95 \times 10^4$    | $1.11 \times 10^5$    | $3.01 \times 10^5$    | -                  | $7.49 \times 10^7$ |
| ${}^3(D^+/A^-)_2$ | $1.85 \times 10^7$    | $2.53 \times 10^8$    | $3.35 \times 10^6$    | $6.44 \times 10^6$    | $1.20 \times 10^6$    | $3.23 \times 10^7$    | $6.90 \times 10^7$    | $5.97 \times 10^6$    | $6.21 \times 10^8$    | $1.88 \times 10^5$    | $1.80 \times 10^4$    | $1.55 \times 10^4$    | $8.28 \times 10^7$ | -                  |

<sup>a</sup> In s<sup>-1</sup> units.

<sup>b</sup>  $i$  and  $j$  denote the donor (column) and acceptor (row) states for electronic transitions, respectively.



**Table S15.** Rate constants<sup>a</sup> for electronic transitions  $i \rightarrow j$  by the Förster theory for <sup>3</sup>(TCTA/Ir(ppy)<sub>3</sub>/TPBI).

| $(i, j)^b$                                                  | <sup>3</sup> G* <sub>1</sub> | <sup>3</sup> G* <sub>2</sub> | <sup>3</sup> G* <sub>3</sub> | <sup>3</sup> A* <sub>1</sub> | <sup>3</sup> (D <sup>+</sup> /A <sup>-</sup> ) <sub>1</sub> | <sup>3</sup> (D <sup>+</sup> /A <sup>-</sup> ) <sub>2</sub> | <sup>3</sup> G* <sub>4</sub> | <sup>3</sup> G* <sub>5</sub> | <sup>3</sup> G* <sub>6</sub> |
|-------------------------------------------------------------|------------------------------|------------------------------|------------------------------|------------------------------|-------------------------------------------------------------|-------------------------------------------------------------|------------------------------|------------------------------|------------------------------|
| <sup>3</sup> G* <sub>1</sub>                                | -                            | $1.29 \times 10^9$           | $8.29 \times 10^8$           | $2.53 \times 10^2$           | $6.45 \times 10^0$                                          | $1.06 \times 10^{-1}$                                       | $7.38 \times 10^9$           | $1.74 \times 10^6$           | $3.22 \times 10^5$           |
| <sup>3</sup> G* <sub>2</sub>                                | $5.74 \times 10^9$           | -                            | $1.88 \times 10^9$           | $1.07 \times 10^0$           | $1.04 \times 10^0$                                          | $5.75 \times 10^{-1}$                                       | $2.37 \times 10^7$           | $8.92 \times 10^5$           | $4.12 \times 10^9$           |
| <sup>3</sup> G* <sub>3</sub>                                | $5.96 \times 10^9$           | $3.03 \times 10^9$           | -                            | $3.17 \times 10^0$           | $2.78 \times 10^{-1}$                                       | $4.86 \times 10^{-3}$                                       | $5.27 \times 10^6$           | $7.82 \times 10^9$           | $3.73 \times 10^6$           |
| <sup>3</sup> A* <sub>1</sub>                                | $1.81 \times 10^5$           | $1.71 \times 10^2$           | $3.14 \times 10^2$           | -                            | $7.56 \times 10^6$                                          | $1.36 \times 10^5$                                          | $3.05 \times 10^4$           | $2.84 \times 10^{-2}$        | $2.97 \times 10^0$           |
| <sup>3</sup> (D <sup>+</sup> /A <sup>-</sup> ) <sub>1</sub> | $1.11 \times 10^4$           | $3.99 \times 10^2$           | $6.63 \times 10^1$           | $1.82 \times 10^7$           | -                                                           | $3.28 \times 10^8$                                          | $2.29 \times 10^1$           | $2.98 \times 10^0$           | $2.50 \times 10^0$           |
| <sup>3</sup> (D <sup>+</sup> /A <sup>-</sup> ) <sub>2</sub> | $2.74 \times 10^2$           | $3.33 \times 10^2$           | $1.75 \times 10^0$           | $4.96 \times 10^5$           | $4.96 \times 10^8$                                          | -                                                           | $4.88 \times 10^0$           | $8.46 \times 10^{-1}$        | $1.43 \times 10^{-1}$        |
| <sup>3</sup> G* <sub>4</sub>                                | $2.68 \times 10^{13}$        | $1.92 \times 10^{10}$        | $2.66 \times 10^9$           | $1.55 \times 10^5$           | $4.86 \times 10^1$                                          | $6.83 \times 10^0$                                          | -                            | $3.62 \times 10^9$           | $2.39 \times 10^9$           |
| <sup>3</sup> G* <sub>5</sub>                                | $4.74 \times 10^{10}$        | $5.44 \times 10^9$           | $2.96 \times 10^{13}$        | $1.09 \times 10^0$           | $4.74 \times 10^1$                                          | $8.89 \times 10^0$                                          | $2.72 \times 10^{10}$        | -                            | $7.39 \times 10^9$           |
| <sup>3</sup> G* <sub>6</sub>                                | $1.37 \times 10^{10}$        | $3.92 \times 10^{13}$        | $2.20 \times 10^{10}$        | $1.77 \times 10^2$           | $6.21 \times 10^1$                                          | $2.35 \times 10^0$                                          | $2.79 \times 10^{10}$        | $1.15 \times 10^{10}$        | -                            |

<sup>a</sup> In s<sup>-1</sup> units.

<sup>b</sup>  $i$  and  $j$  denote the donor (column) and acceptor (row) states for electronic transitions, respectively.

**Table S16.** Electronic Hamiltonian<sup>a,b</sup> adopted as the simplified 4-state system for the mixed quantum-classical simulations, extracted from <sup>3</sup>(TCTA/TPBI/Ir(ppy)<sub>3</sub>).

|                                                | <sup>3</sup> (G <sup>+</sup> /A <sup>-</sup> ) | <sup>3</sup> G <sup>*</sup> | <sup>3</sup> A <sup>*</sup> | <sup>3</sup> (D <sup>+</sup> /A <sup>-</sup> ) |
|------------------------------------------------|------------------------------------------------|-----------------------------|-----------------------------|------------------------------------------------|
| <sup>3</sup> (G <sup>+</sup> /A <sup>-</sup> ) | 0.0                                            | -311                        | -74                         | -2.64                                          |
| <sup>3</sup> G <sup>*</sup>                    | -311                                           | 170                         | -11                         | -0.81                                          |
| <sup>3</sup> A <sup>*</sup>                    | -74                                            | -11                         | 1643                        | -5.14                                          |
| <sup>3</sup> (D <sup>+</sup> /A <sup>-</sup> ) | -2.64                                          | -0.81                       | -5.14                       | 2595                                           |

<sup>a</sup> In cm<sup>-1</sup> units.

<sup>b</sup> The diagonal and the off-diagonal elements of the Hamiltonian are excitation energies and electronic couplings, respectively.

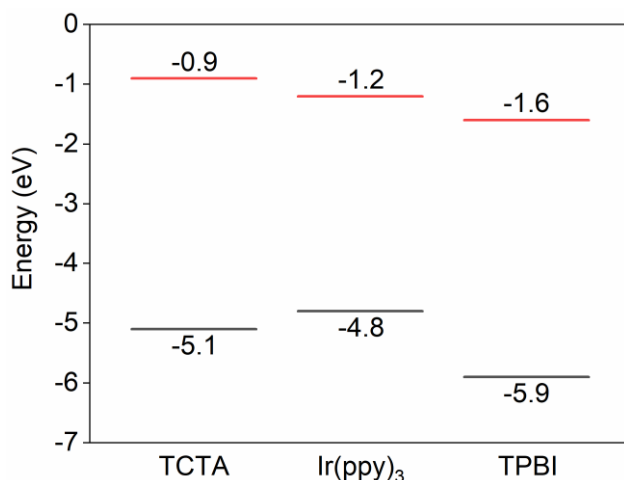

**Figure S1.** Energy level diagram showing the HOMO (black lines) and the LUMO (red lines) levels for TCTA, Ir(ppy)<sub>3</sub>, and TPBI materials. The HOMO-LUMO gap of the (TCTA, TPBI) pair is larger than that of (Ir(ppy)<sub>3</sub>, TPBI) pair, but smaller than that of (TCTA, Ir(ppy)<sub>3</sub>) pair. The HOMO and LUMO energies were obtained from DFT calculations with the B3LYP functional.

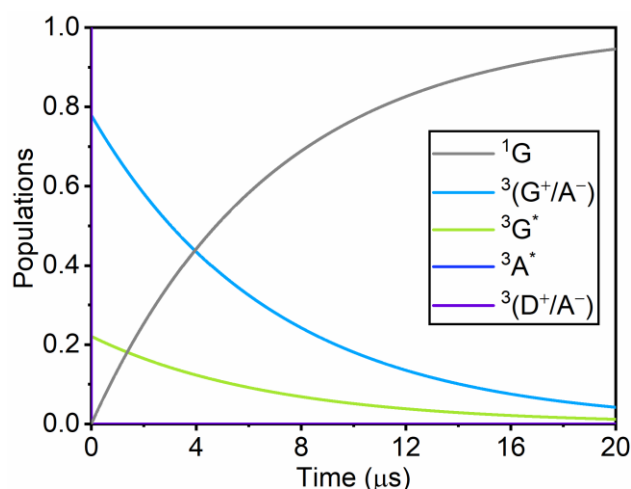

**Figure S2.** Population changes in <sup>3</sup>(TCTA/TPBI/Ir(ppy)<sub>3</sub>) with the assumption that the initial state is the lowest <sup>3</sup>(D<sup>+</sup>/A<sup>-</sup>) state. The figure is an extension of Figure 9b into the long-time limit. One can see that the population ratio between <sup>3</sup>(G<sup>+</sup>/A<sup>-</sup>) and <sup>3</sup>G\* is the same all the time due to their fast equilibration, and the two populations eventually decay to zero through the emissive relaxation of <sup>3</sup>G\* → <sup>1</sup>G.

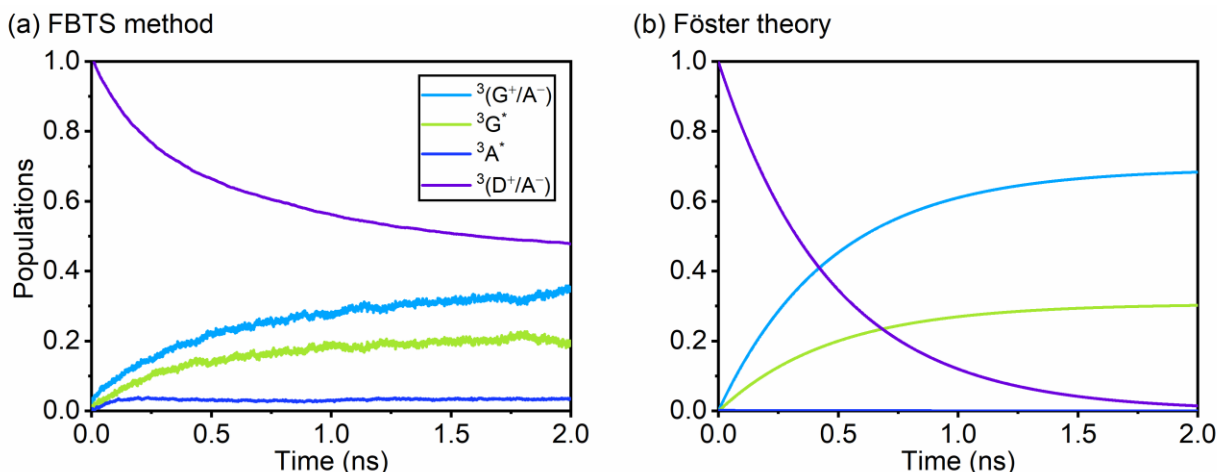

**Figure S3.** (a) Population dynamics is from the mixed quantum-classical (MQC) simulations with the forward-backward trajectory solution (FBTS) method [1,2]. We employed a simplified 4-state system, based on  $^3(\text{G}^+/\text{A}^-)$ ,  $^3\text{G}^*$ ,  $^3\text{A}^*$ , and  $^3(\text{D}^+/\text{A}^-)$ , as represented by the Hamiltonian given in Table S16. A total of 10,000 trajectories were employed with a time step of 0.5 fs. Influence of the environment was modeled by a Debye spectral density,  $J(\omega) = 2\lambda_{\text{ph}}\omega\omega_c / (\omega^2 + \omega_c^2)$  with  $\lambda_{\text{ph}} = 2000 \text{ cm}^{-1}$  and  $\omega_c = 300 \text{ fs}$ . This spectral density was implemented with 1000 discrete bath modes with a maximum frequency at  $\omega_{\text{max}} = 3000 \text{ cm}^{-1}$ . The MQC simulation result corresponds quite well with the results from the master equation formalism using the Förster theory, shown in (b).

## Supporting References

1. Hsieh, C.-Y.; Kapral, R., Analysis of the forward-backward trajectory solution for the mixed quantum-classical Liouville equation. *J. Chem. Phys.* **2013**, *138*, 134110.
2. Hsieh, C.-Y.; Kapral, R., Nonadiabatic dynamics in open quantum-classical systems: Forward-backward trajectory solution. *J. Chem. Phys.* **2012**, *137*, 22A507.
